# Supplementary material for: Infective Endocarditis After Melody Valve Implantation in the Pulmonary Position: A Systematic Review
Source: PubMed Central journal article supplement — J Am Heart Assoc. 2018 Jun 22;7(13):e008163. doi: 10.1161/JAHA.117.008163 (PMC6064882; doi:10.1161/jaha.117.008163), 2018-06-22

# **SUPPLEMENTAL MATERIAL**

**Data S1.**

***PubMed search terms:***

((("Endocarditis"[Mesh] OR "Endocarditis"[tiab] OR infection[Mesh]) AND ( "Heart Valve Prosthesis"[Mesh] OR "Heart Valve Prosthesis Implantation"[Mesh] OR melody valve[tiab]) AND (pulmonary valve[Mesh] OR pulmonary valve[tiab] OR right ventricular outflow[tiab])) OR (("endocarditis"[Mesh] OR "endocardit\*"[tiab]) AND (Melody[tiab] OR transcatheter pulm\*[tiab] OR percutaneous pulm\*[tiab]))))

Figure S1. The PRISMA flow chart of the literature search.

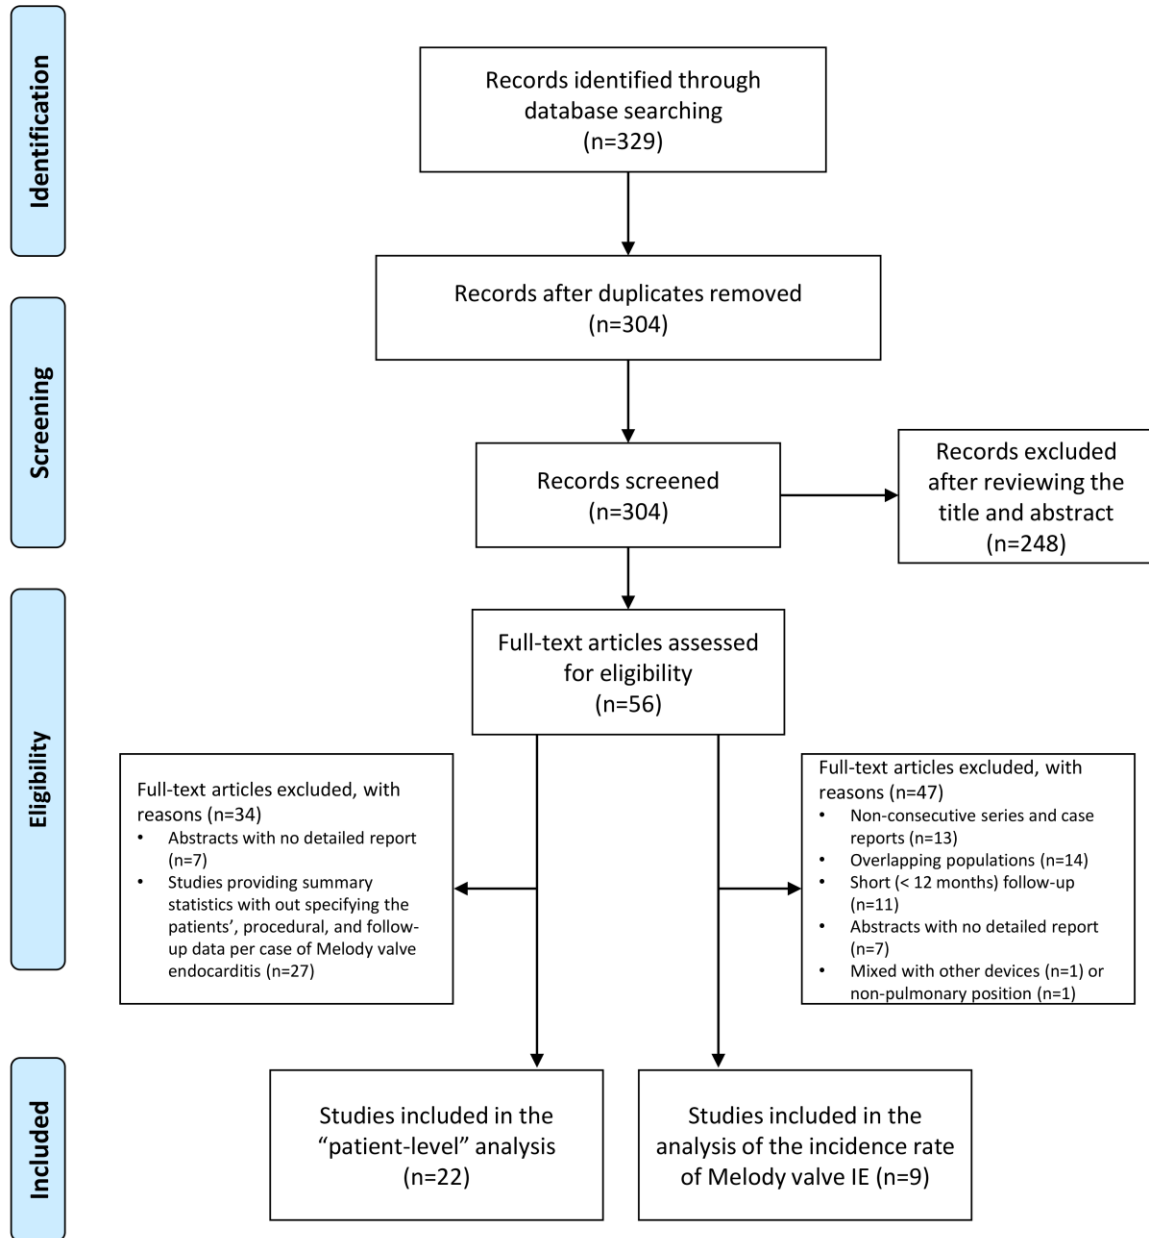

Supplement: JAH3-7-e008163-s001.pdf [file JAH3-7-e008163-s001.pdf]
